# Supplementary material
Source: PubMed Central journal article supplement (PMC7241025)
Supplement: ao0c00980_si_001.pdf [file ao0c00980_si_001.pdf]

## Draft Genome of the Liver Fluke *Fasciola gigantica*

Tripti Pandey<sup>1#</sup>, Arpita Ghosh<sup>2#</sup>, Vivek N Todur<sup>2</sup>, Vijayakumar Rajendran<sup>1</sup>, Parismita Kalita<sup>1</sup>,  
Jupitara Kalita<sup>1</sup>, Rohit Shukla<sup>1</sup>, Purna B Chetri<sup>1</sup>, Harish Shukla<sup>1</sup>, Amit Sonkar<sup>1</sup>, Denzelle Lee  
Lyngdoh<sup>1</sup>, Radhika Singh<sup>1</sup>, Heena Khan<sup>1</sup>, Joplin Nongkhaw<sup>1</sup>, Kanhu Charan Das<sup>1</sup>, Timir  
Tripathi<sup>1\*</sup>

<sup>1</sup>Molecular and Structural Biophysics Laboratory, Department of Biochemistry, North-Eastern  
Hill University, Shillong 793022, India

<sup>2</sup>Eurofins Genomics India Pvt. Ltd, Doddanekkundi, Bengaluru 560048, India

\* Corresponding author: Email: [timir.tripathi@gmail.com](mailto:timir.tripathi@gmail.com)

#Both authors contributed equally to the work

---

Supplementary Figure S1. GO classification of genes similar in *F. hepatica* and *F. gigantica*.

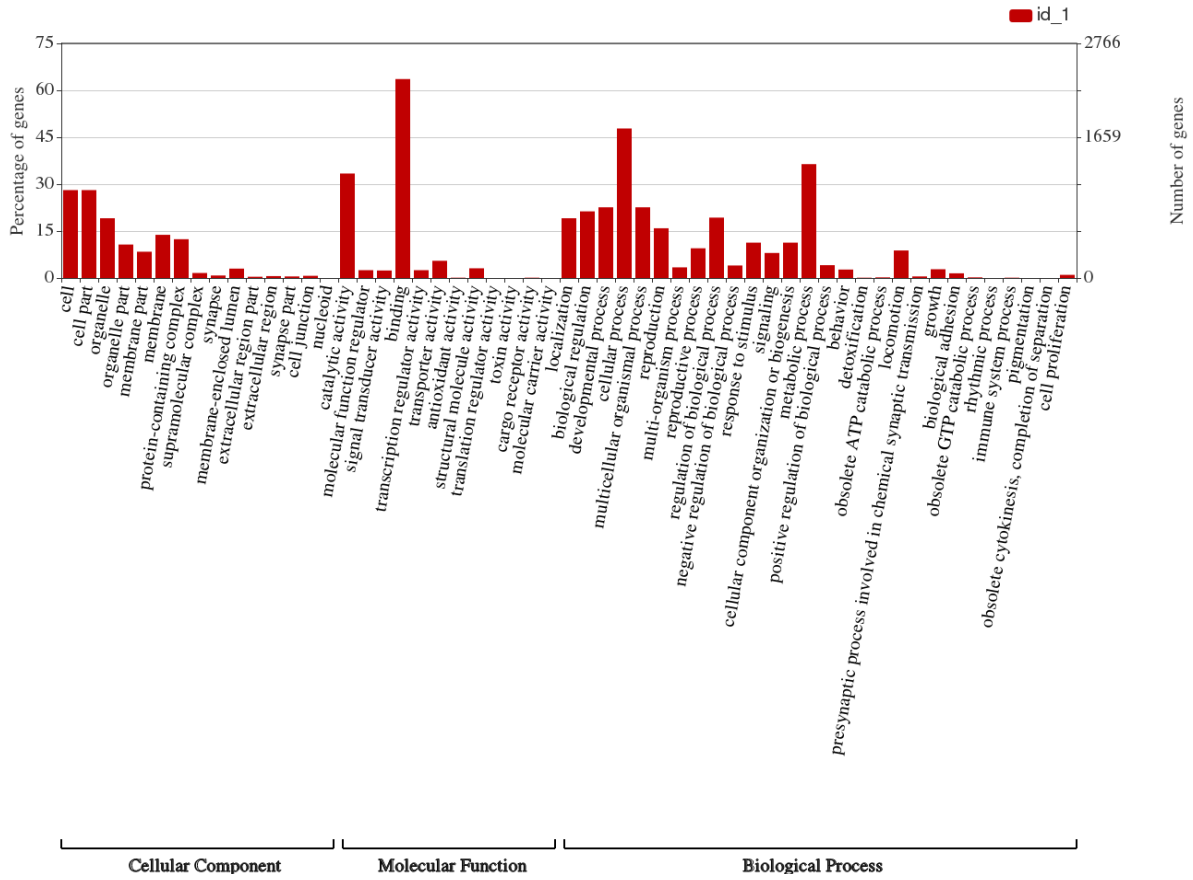

Supplementary Figure S2. Schematic pathway of glycolysis <sup>1-3</sup>.

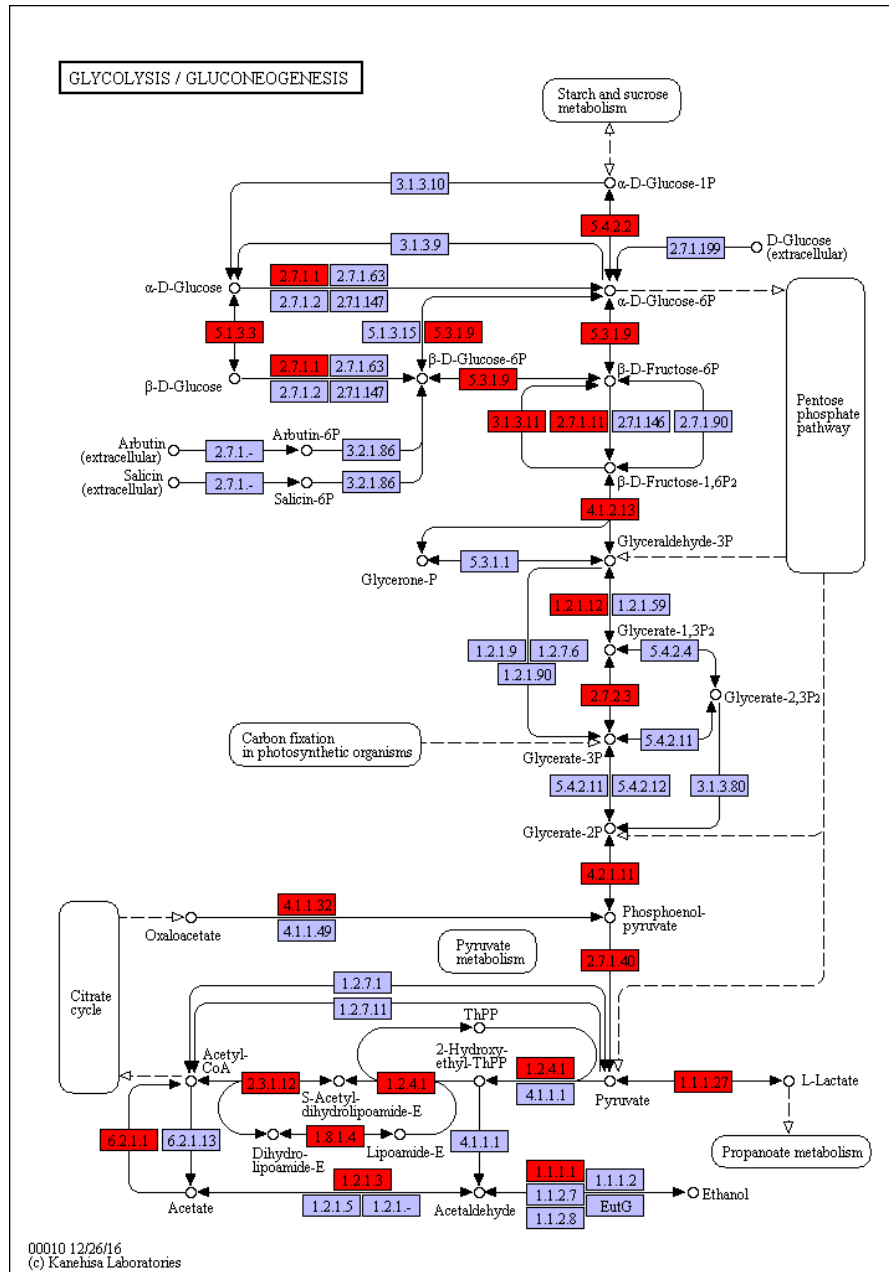

Supplementary Figure S3. Schematic pathway of TCA cycle <sup>1-3</sup>.

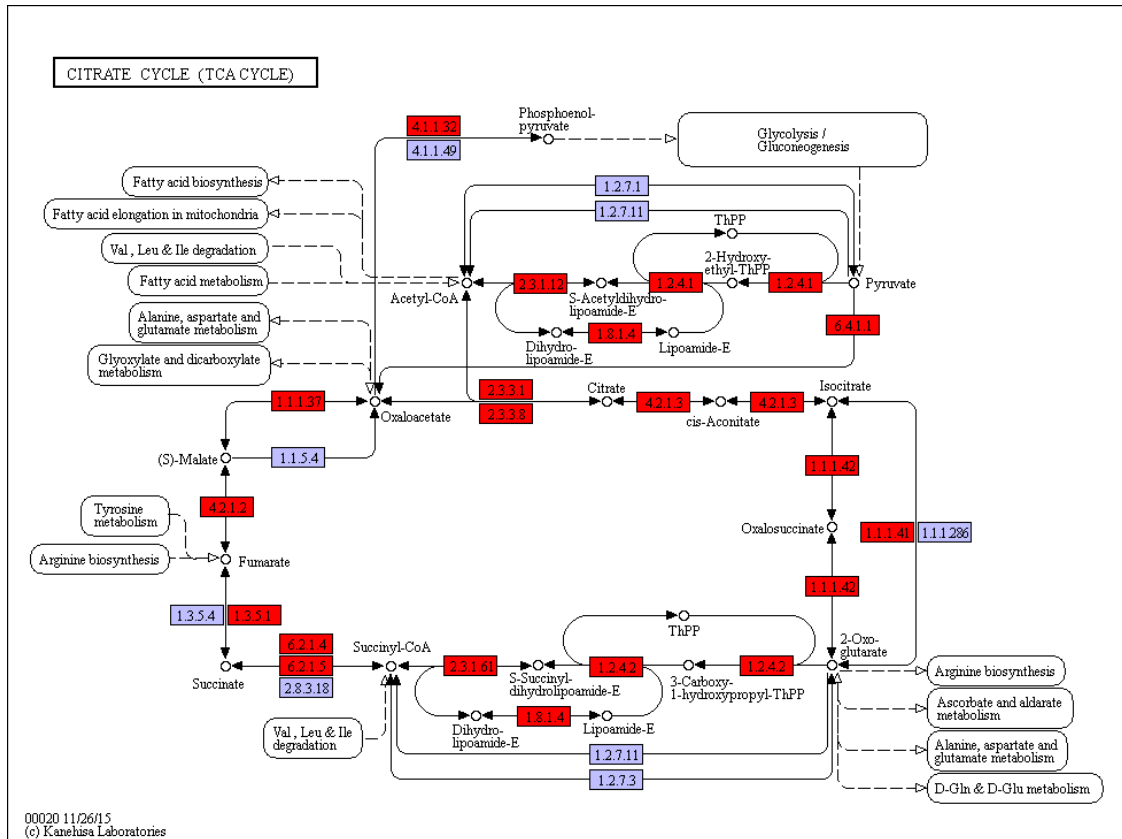

Supplementary Figure S4. Schematic pathway of fatty acid biosynthesis <sup>1-3</sup>.

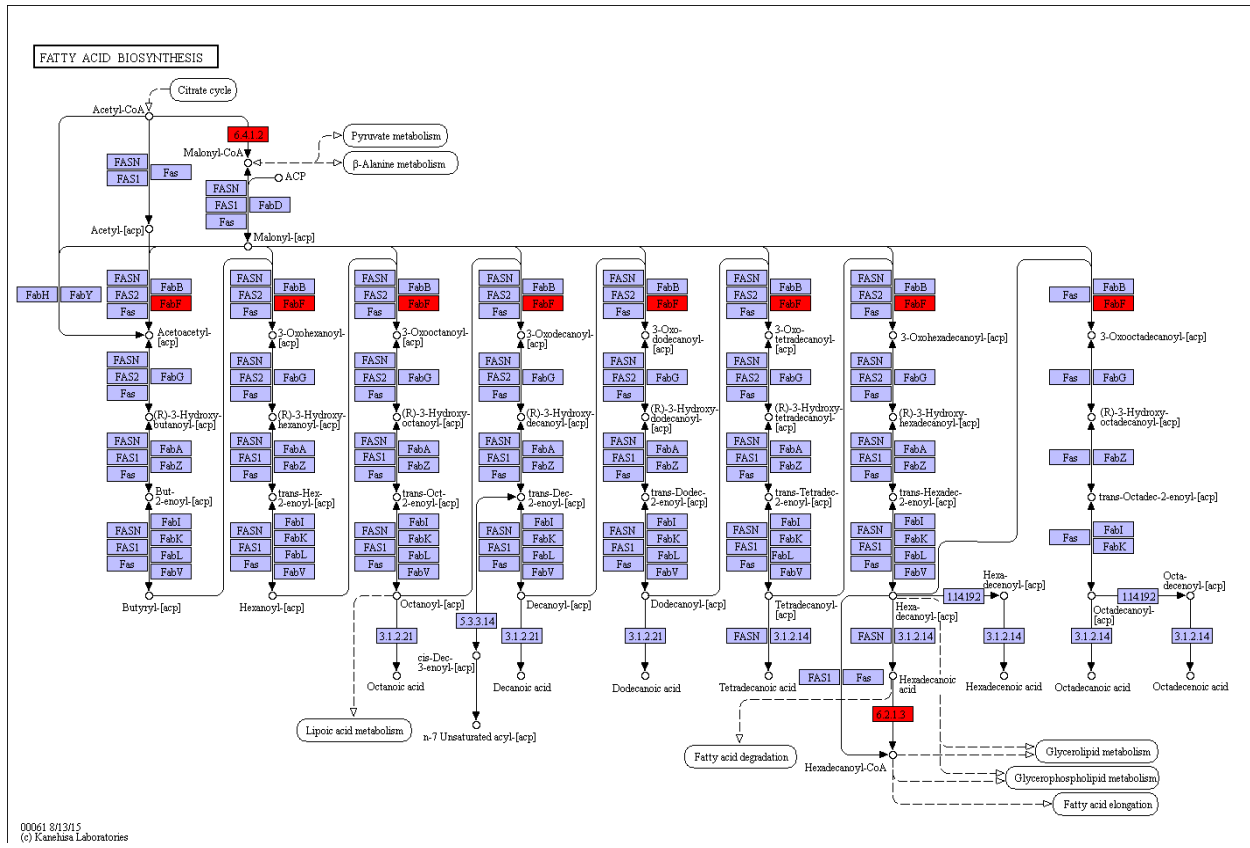

Supplementary Figure S5. Schematic pathway of fatty acid degradation <sup>1-3</sup>.

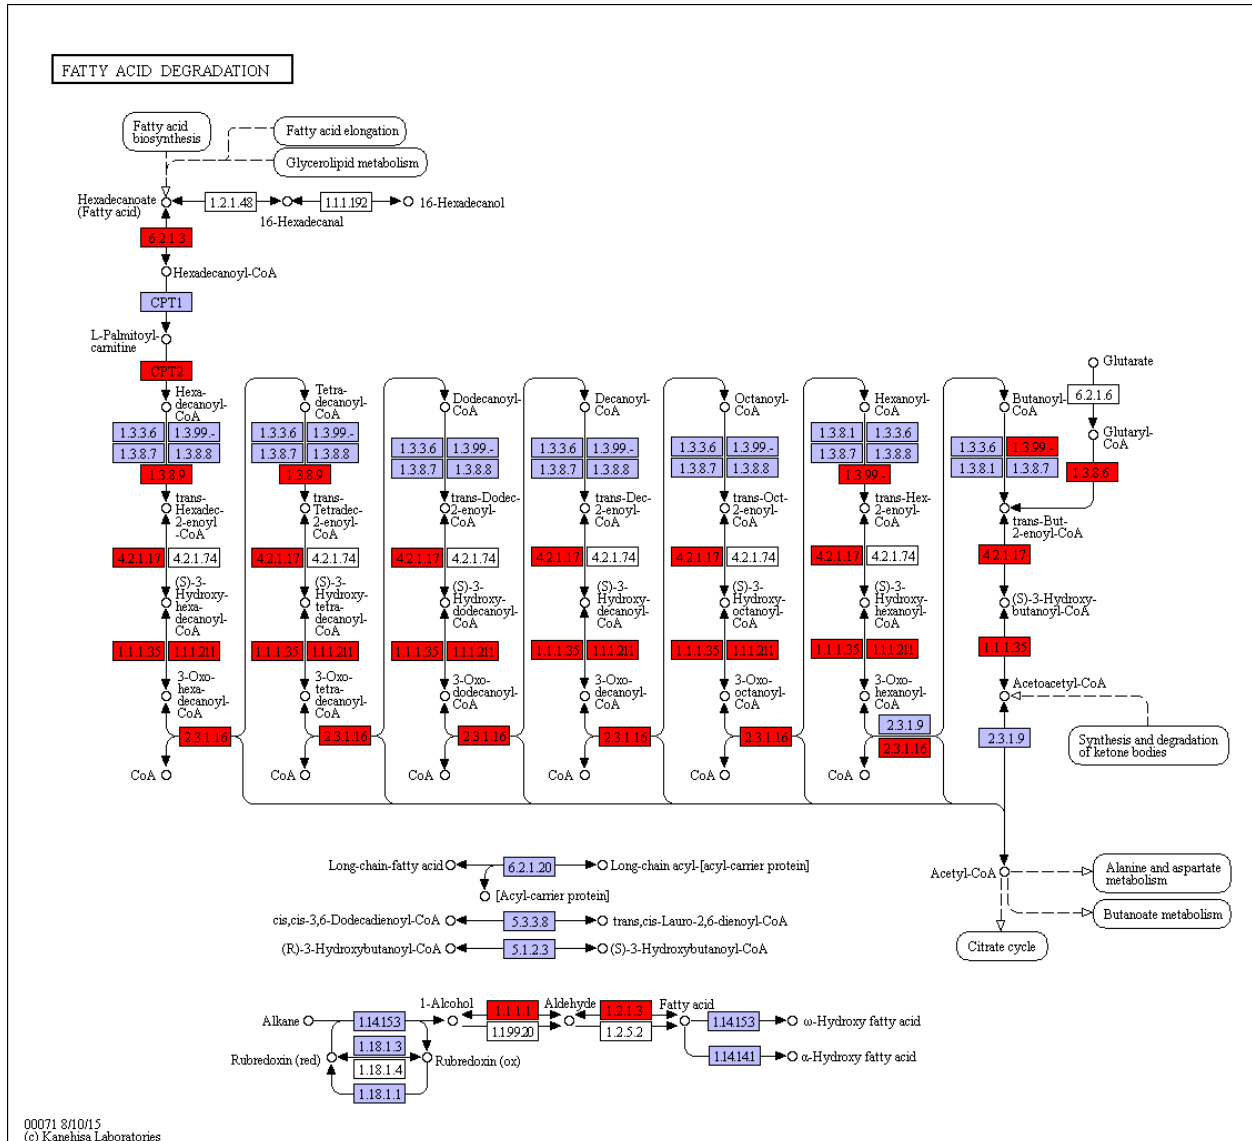

**Note:**

The Supplementary Figure S2-S5 are taken from the KEGG website (<https://www.genome.jp/kegg/>) and are cited at places used, and reference are provided below:

**References for KEGG pathways:**

- 1 Kanehisa, M., Furumichi, M., Tanabe, M., Sato, Y. & Morishima, K. KEGG: new perspectives on genomes, pathways, diseases and drugs. *Nucleic Acids Res* **45**, D353-361, (2017).
- 2 Kanehisa, M. & Goto, S. KEGG: Kyoto encyclopedia of genes and genomes. *Nucleic Acids Res* **28**, 27-30 (2000).
- 3 Kanehisa, M., Sato, Y., Kawashima, M., Furumichi, M. & Tanabe, M. KEGG as a reference resource for gene and protein annotation. *Nucleic Acids Res* **44**, D457-462 (2016).
